# Supplementary material for: Association between soil heavy metals and fatty liver disease in men in Taiwan: a cross sectional study
Source: PubMed Central journal article supplement — BMJ Open. 2017 Jan 23;7(1):e014215. doi: 10.1136/bmjopen-2016-014215 (PMC5278238; doi:10.1136/bmjopen-2016-014215), 2017-01-23
Supplement: bmjopen-2016-014215supp_appendix.pdf [file bmjopen-2016-014215supp_appendix.pdf]

Appendix :

Factors of Metabolic Syndrome

|                               |     | The degree of fatty liver disease |                 | P-value | * |
|-------------------------------|-----|-----------------------------------|-----------------|---------|---|
|                               |     | Negative/Mild                     | Moderate/Severe |         |   |
| 1. Central obesity (Waist)    | Yes | 155(47.26)                        | 173(52.74)      | <0.001  | * |
|                               | No  | 680(84.16)                        | 128(15.84)      |         |   |
| 2. Hypertension               | Yes | 301(64.59)                        | 165(35.41)      | <0.001  | * |
|                               | No  | 535(79.73)                        | 136(20.27)      |         |   |
| 3. HDL Cholesterol            | Yes | 270(62.50)                        | 162(37.50)      | <0.001  | * |
|                               | No  | 565(80.37)                        | 138(19.63)      |         |   |
| 4. Fasting glucose (AC Sugar) | Yes | 171(52.13)                        | 157(47.87)      | <0.001  | * |
|                               | No  | 663(82.36)                        | 142(17.64)      |         |   |
| 5. Triglyceride               | Yes | 218(61.24)                        | 138(38.76)      | <0.001  | * |
|                               | No  | 614(79.43)                        | 159(20.57)      |         |   |

**Missing data**

Central obesity (Waist)-1 case; HDL Cholesterol- 2 cases

Fasting glucose (AC Sugar)-4 cases; Triglyceride-8 cases

**The definition of abnormal values of metabolic factors according to ATP III 2004**

| Item                | Male                                                                                             | Female             |
|---------------------|--------------------------------------------------------------------------------------------------|--------------------|
| (1) Waist           | $\geq 90\text{cm}$                                                                               | $\geq 80\text{cm}$ |
| (2) Hypertension    | Systolic blood pressure $\geq 130\text{ mmHg}$<br>Diastolic blood pressure $\geq 85\text{ mmHg}$ |                    |
| (3) HDL Cholesterol | $<40\text{mg/dL}$                                                                                | $<50\text{mg/dL}$  |
| (4) Triglyceride    | $\geq 150\text{mg/dL}$                                                                           |                    |
| (5) AC Sugar        | $\geq 100\text{mg/dL}$                                                                           |                    |
